# Supplementary material
Source: PubMed Central journal article supplement (PMC2746769)
Supplement: 00063.2009_1.pdf [file 00063.2009_1.pdf]

### RT Timelocked using PRESTIM baseline

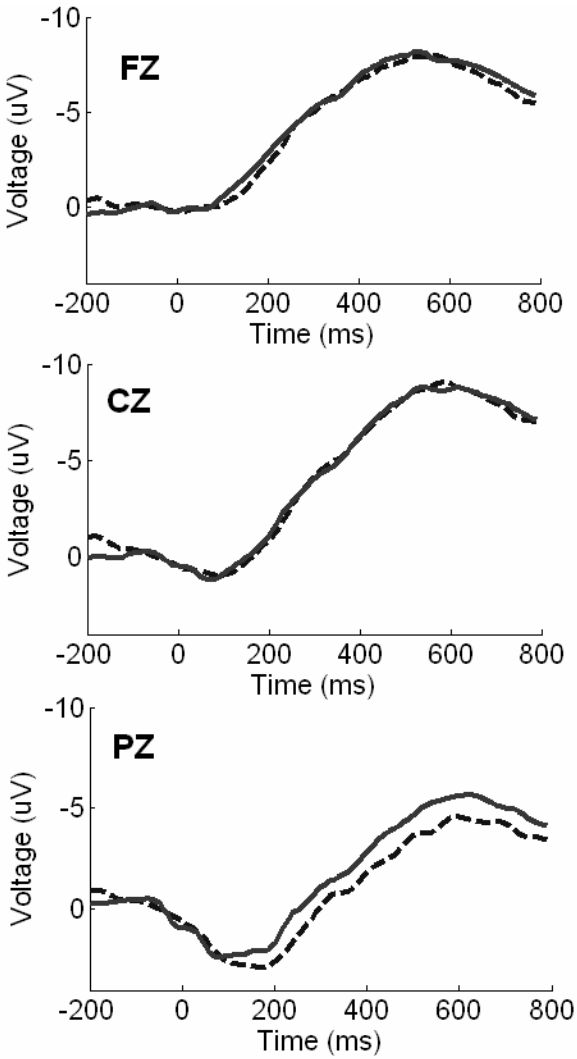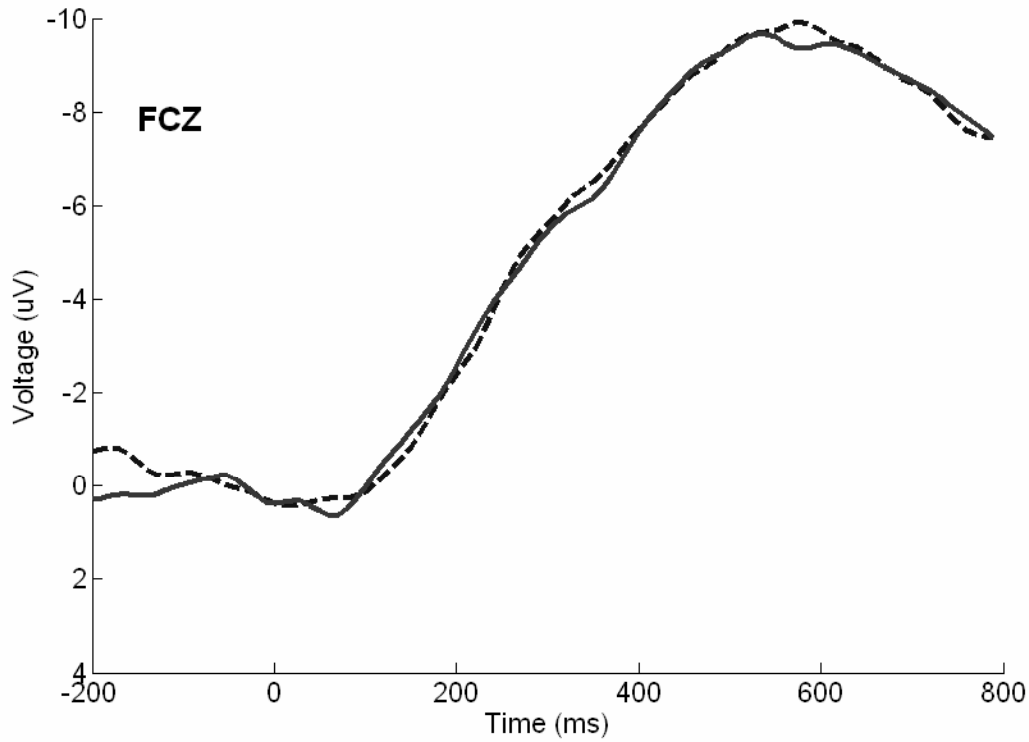

--- Small Errors  
— Large Errors

### Supplemental Figure Legend

A.1) Large and small error trial waveforms time-locked to reaction time with a pre-stimulus baseline at selected central electrodes pooled across each stage, with activity at FCz highlighted. A 2 (error magnitude, large vs. small) x 3 (time window: 200-400 ms, 400-600 ms, 600-800 ms) RM ANOVA failed to find a main effect difference in error magnitude ( $F_{(1, 37)} = .917, p > .30, \eta^2_p = .024$ ) or an error magnitude x time window interaction ( $F_{(2, 74)} = .040, p > .90, \eta^2_p = .001$ ).
